# Supplementary material
Source: publisher figshare collection journal article supplement (https://sage.figshare.com/ndownloader/files/16236248)
Supplement: Supplementary file 1 [file 16236248]

## Tables

**Table 6. Distribution of healthcare-associated infection in wards of study**

| Type of HAI                                   | n=29 | %     |
|-----------------------------------------------|------|-------|
| Surgical site infection                       | 10   | 34.48 |
| (Catheter associated) Urinary tract infection | 5    | 17.24 |
| Blood-stream infection                        | 4    | 13.79 |
| Skin/soft tissue infection                    | 10   | 34.48 |
